# Supplementary material
Source: HighWire-hosted journal article supplement (https://erj.ersjournals.com/content/50/5/1700434)
Supplement: inline-supplementary-material-1 [file inline-supplementary-material-1.pdf]

**TABLE S1** Summary of missing data

|                                      | Number missing<br>(N=28 883) | Proportion data missing |
|--------------------------------------|------------------------------|-------------------------|
| <b>Reconsultation within 30 days</b> | 0                            | 0%                      |
| <b>Hospitalisation/death</b>         | 24                           | 0.1%                    |
| <b>Antibiotic strategy</b>           | 0                            | 0%                      |
| <b>Age</b>                           | 0                            | 0%                      |
| <b>Gender</b>                        | 5                            | 0.02%                   |
| <b>Duration illness</b>              | 0                            | 0%                      |
| <b>Received pneumovax</b>            | 0                            | 0%                      |
| <b>Smoking status</b>                | 469                          | 1.6%                    |
| <b>Any co-morbidity</b>              | 0                            | 0%                      |
| <b>Lung co-morbidity</b>             | 0                            | 0%                      |
| <b>Steroid or bronchodilator use</b> | 1313                         | 4.6%                    |
| <b>Deprivation</b>                   | 0                            | 0%                      |
| <b>Symptoms</b>                      |                              |                         |
| Shortness of breath                  | 119                          | 0.4%                    |
| Fever                                | 68                           | 0.2%                    |
| Chills                               | 79                           | 0.3%                    |
| Chest pain                           | 72                           | 0.3%                    |
| Confusion                            | 18                           | 0.1%                    |
| Coryza                               | 98                           | 0.3%                    |
| Headache                             | 85                           | 0.3%                    |
| Muscle aches                         | 82                           | 0.3%                    |
| Diarrhoea                            | 26                           | 0.1%                    |
| Sputum colour                        | 4                            | 0.01%                   |
| <b>Clinical examination</b>          |                              |                         |
| Severity assessment                  | 10                           | 0.03%                   |
| Resp rate                            | 119                          | 0.4%                    |
| Temp                                 | 21                           | 0.7%                    |
| Pulse                                | 12                           | 0.4%                    |
| O <sub>2</sub> sat                   | 5100                         | 17.7%                   |
| Blood pressure                       | 34                           | 0.1%                    |
| Crackles                             | 8                            | 0.03%                   |
| Bronchial breathing                  | 13                           | 0.1%                    |
| Wheeze                               | 10                           | 0.01%                   |
